# Supplementary material for: Not all mosquitoes are created equal: incriminating mosquitoes as vectors of arboviruses
Source: bioRxiv or medRxiv preprint supplement (doi:10.1101/2022.03.08.22272101), 2022-03-10
Supplement: Supplementary file [file media-1.pdf]

**Supplemental Figures For:**

**Not all mosquitoes are created equal: incriminating mosquitoes as vectors of arboviruses**

Morgan P. Kain,<sup>1,2\*</sup> Eloise B. Skinner<sup>1,3</sup>, Tejas S. Athni<sup>1</sup>, Ana L. Ramirez<sup>4</sup>, Erin A. Mordecai<sup>1</sup>, Andrew F. van den Hurk<sup>5\*</sup>

<sup>1</sup>Department of Biology, Stanford University, Stanford, CA, 94305, USA

<sup>2</sup>Natural Capital Project, Woods Institute for the Environment, Stanford University, Stanford, CA 94305, USA

<sup>3</sup>Centre for Planetary Health and Food Security, Griffith University, Gold Coast, QLD, 4222, Australia

<sup>4</sup>Department of Pathology, Microbiology, and Immunology, University of California, Davis, Davis, CA 95616

<sup>5</sup>Public Health Virology, Forensic and Scientific Services, Department of Health, Queensland Government, Brisbane, Queensland, Australia

\***Corresponding authors:** mkk6087@psu.edu (alt: morganpkain@gmail.com);

[andrew.VanDenHurk@health.qld.gov.au](mailto:andrew.VanDenHurk@health.qld.gov.au)

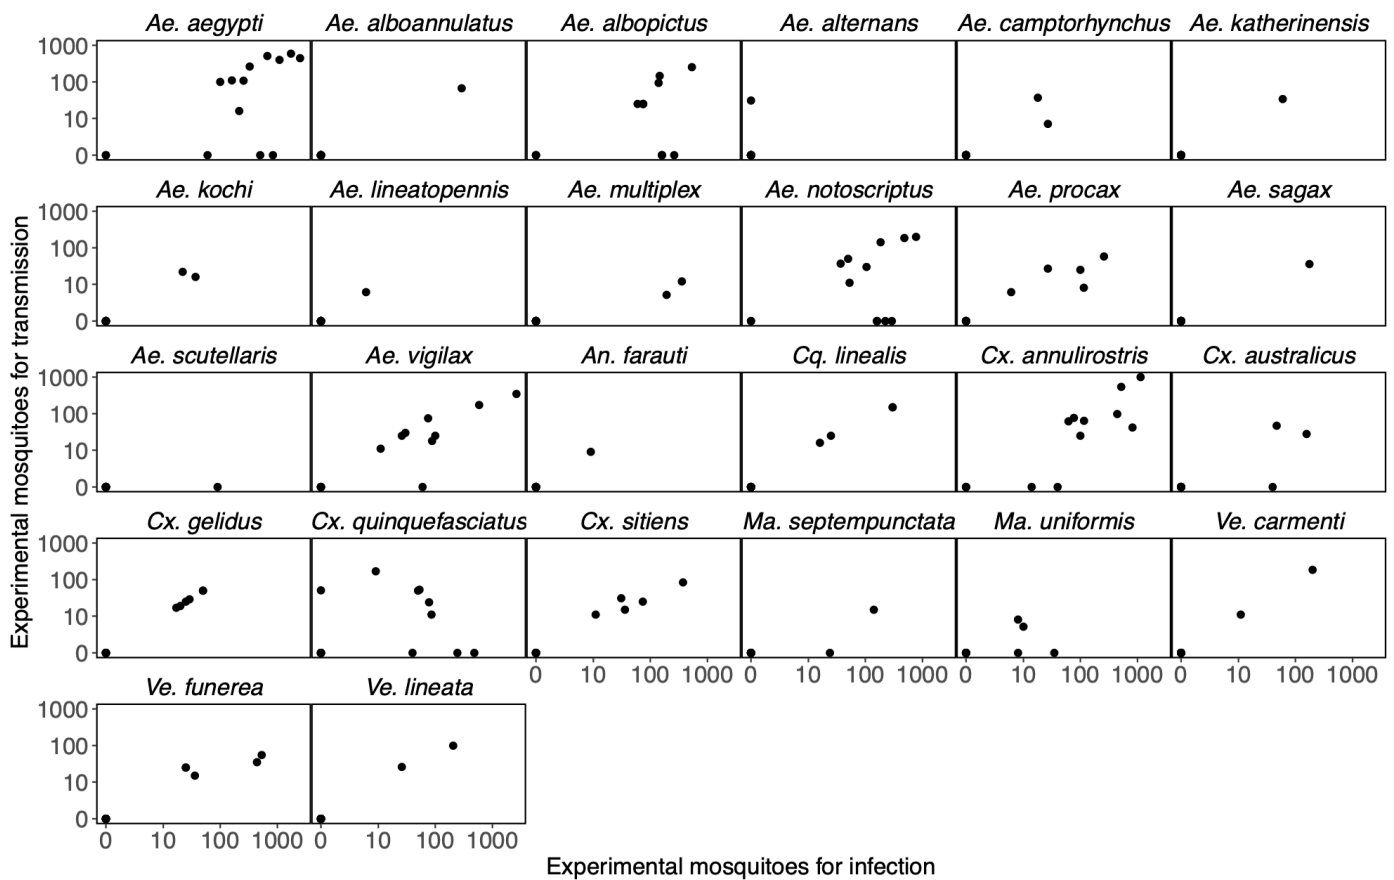

**S1 Fig. Number of mosquitoes of each species assessed for infection and transmission in vector**

**competence experiments.** Mosquito species frequently measured in infection experiments (total sample size across all experiments; X axis) were also more frequently measured in transmission experiments (total sample size across all experiments; Y axis). Each point for a mosquito species represents a different virus.

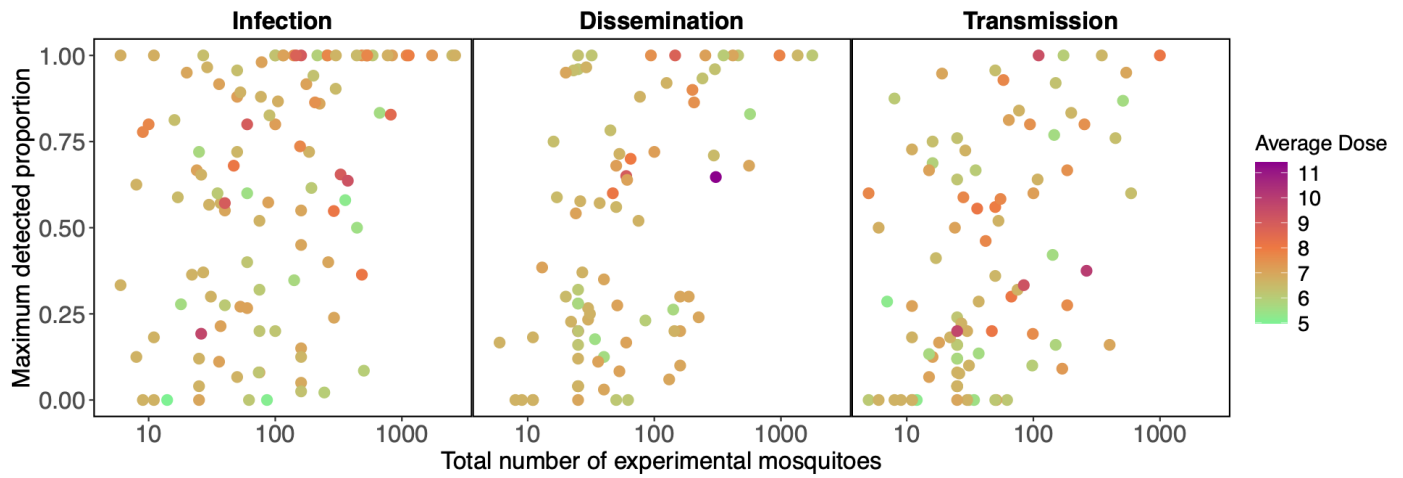

**S2 Fig. Total number of mosquitoes assessed for infection, dissemination and transmission in vector competence experiments.** Increased research effort leads to a higher maximum proportion for infection, dissemination, and transmission (logistic regression,  $p < 0.05$ ). Increased dose does not lead to a detectable increase in maximum proportion (logistic regression,  $p > 0.05$ ). Each point represents a single virus-species pair.

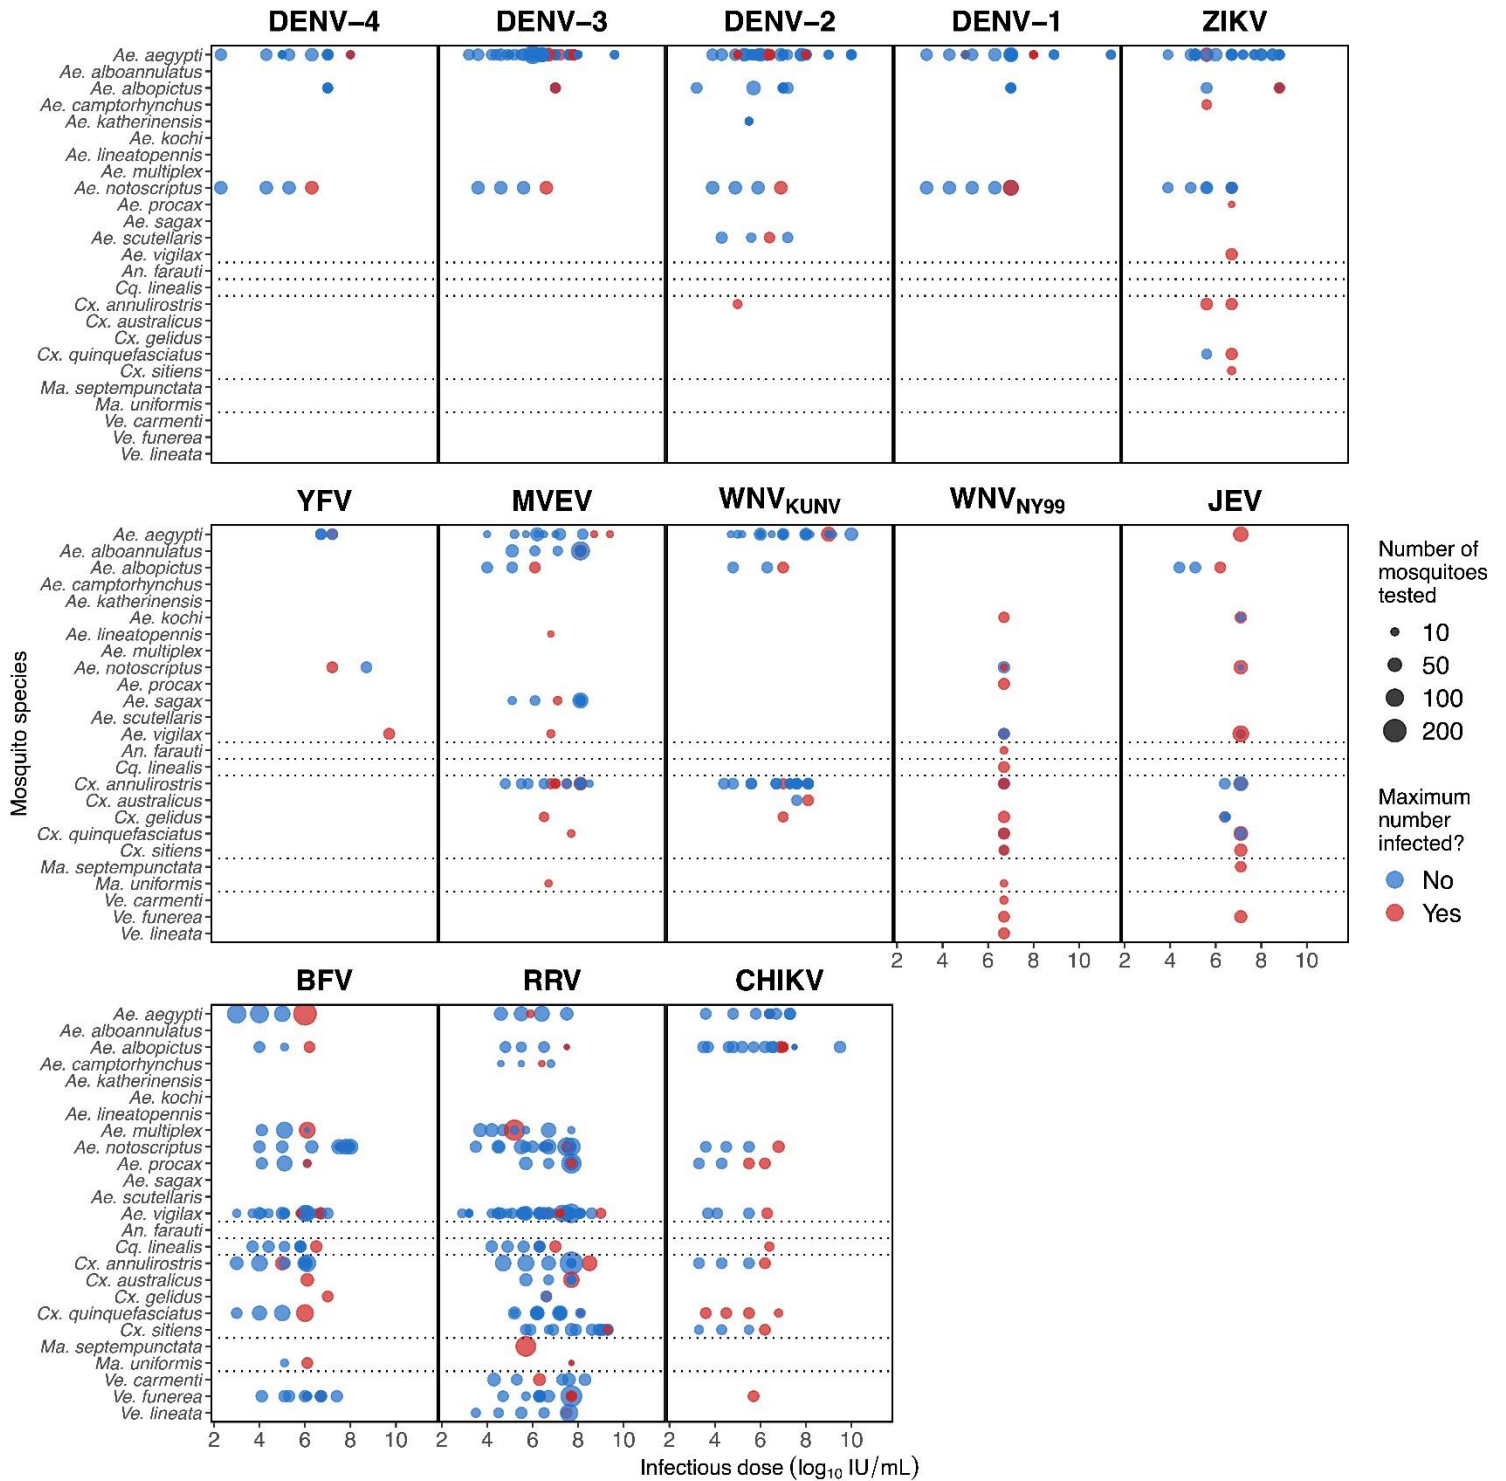

**S3 Fig. Viral doses mosquitoes were exposed to across all laboratory experiments that measured infection.**

Blue points show experimental doses that did not lead to the highest detected proportion of infected mosquitoes; red points show the infectious dose[s] that resulted in the highest observed infected proportion.

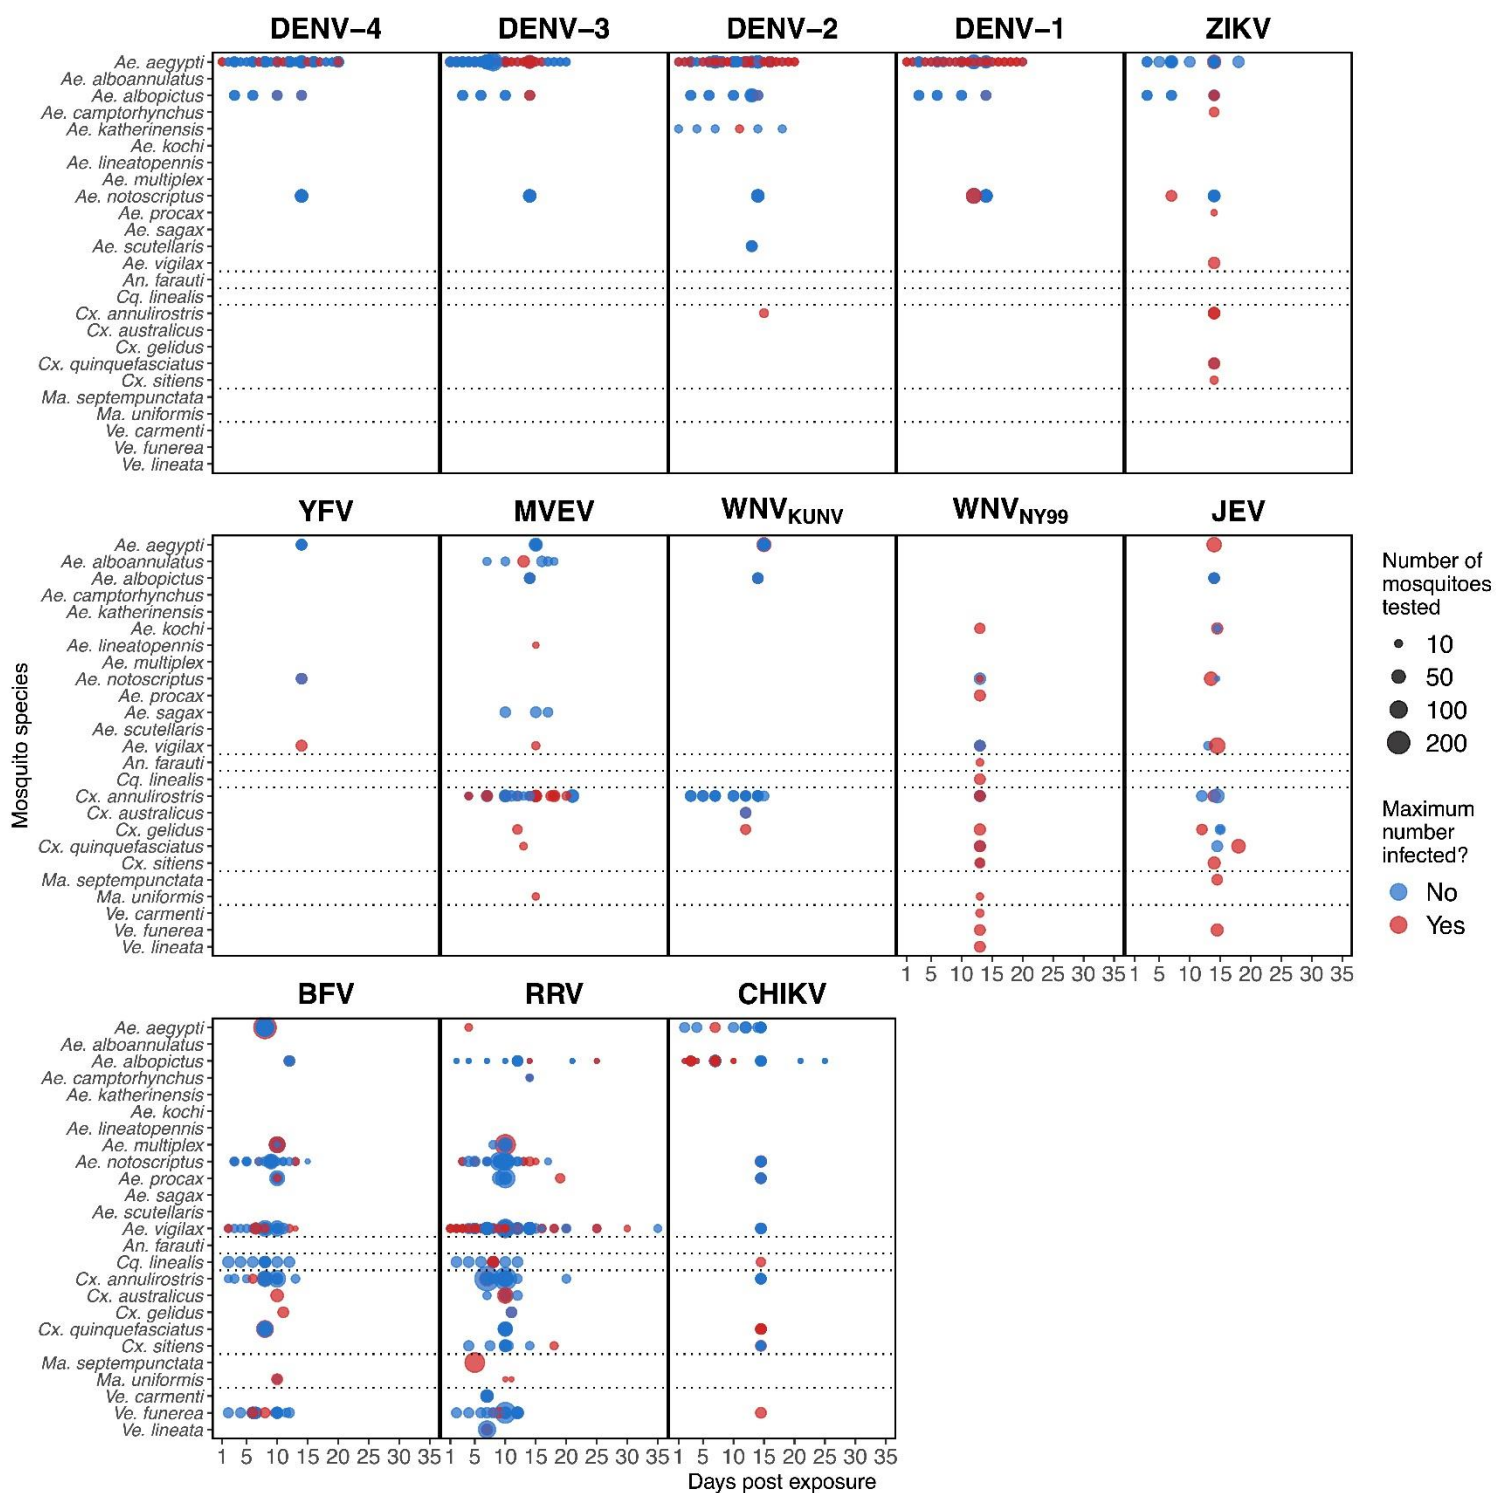

**S4 Fig. Days post viral exposure on which mosquitoes were tested for infection status.** Blue points show experimental days that did not lead to the highest detected proportion of infected mosquitoes; red points show the day[s] that resulted in the highest observed infected proportion.

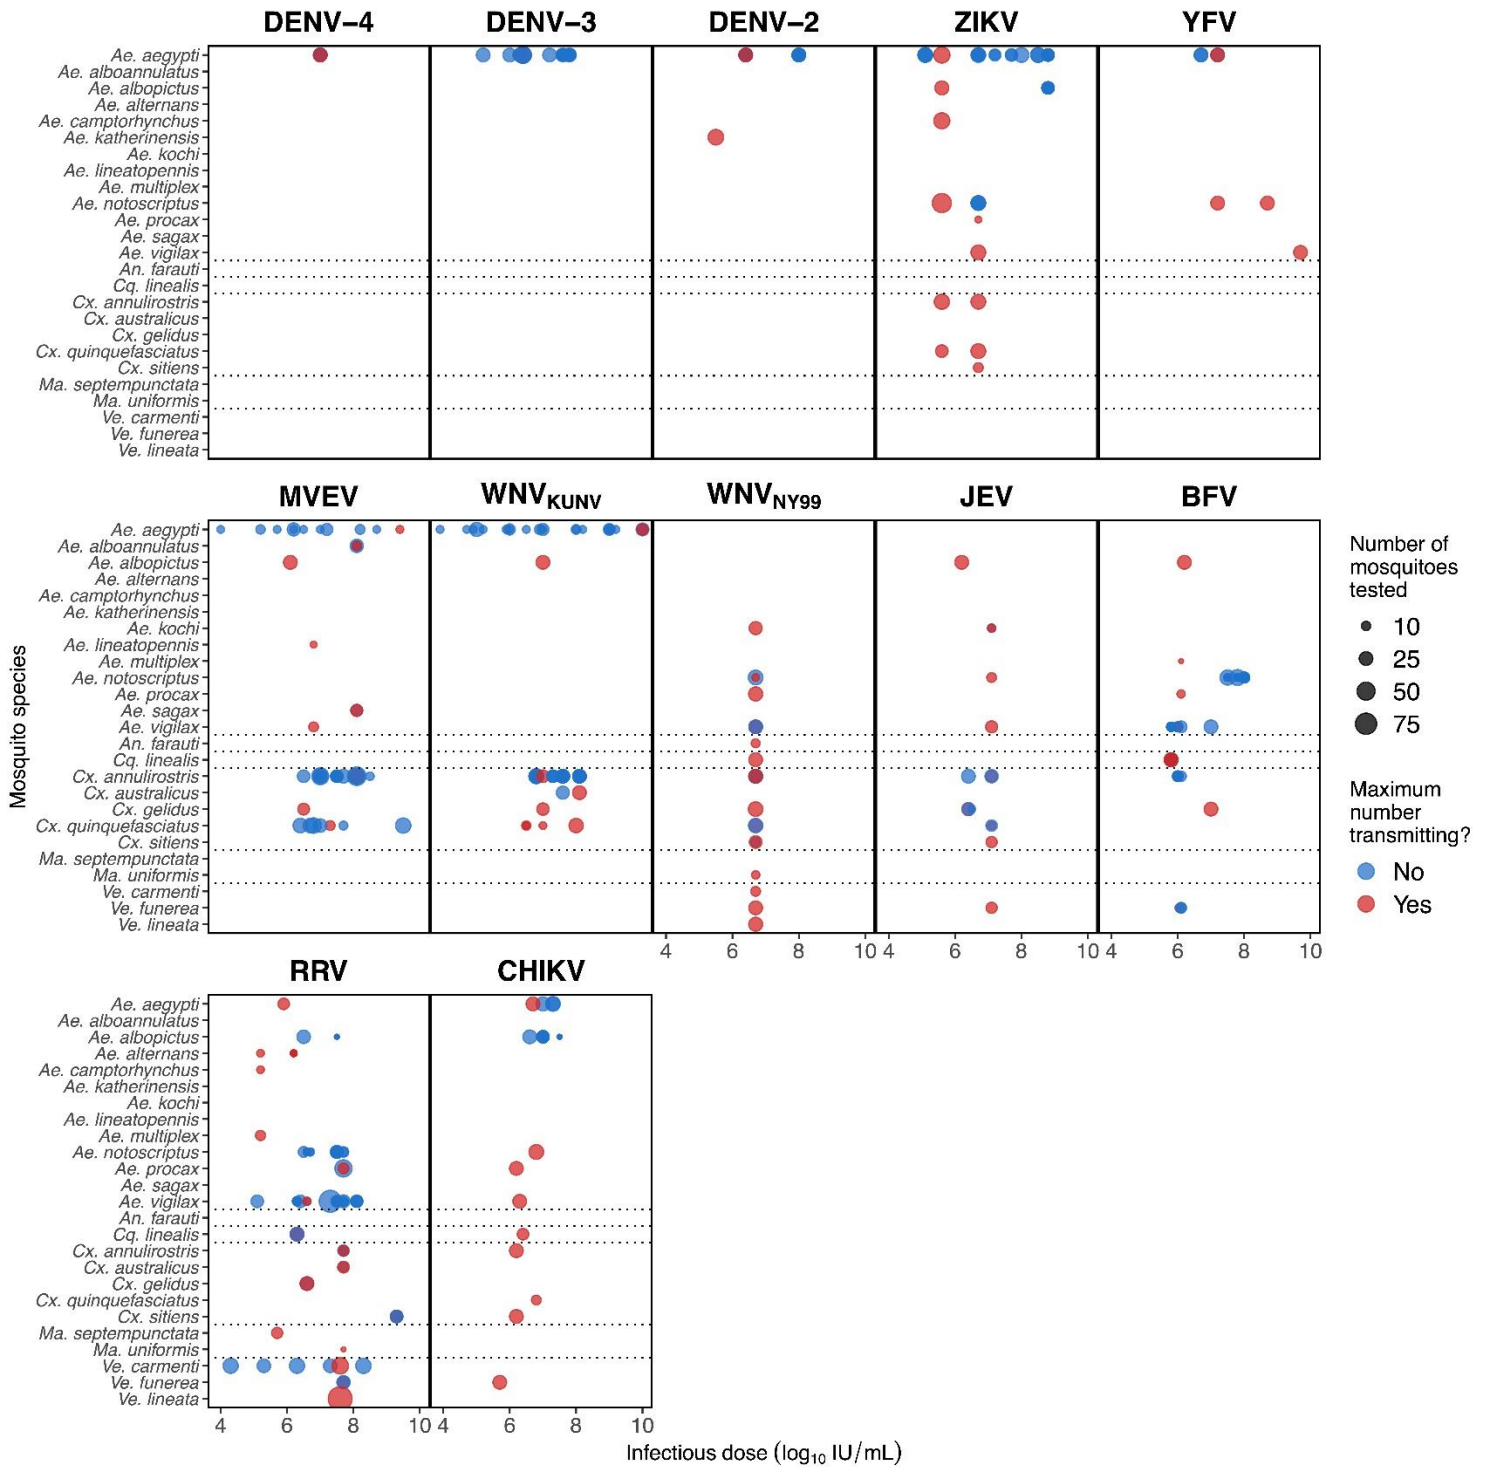

**S5 Fig. Viral doses mosquitoes were exposed to across all laboratory experiments that measured transmission.**

Blue points show experimental doses that did not lead to the highest detected proportion of transmitting mosquitoes; red points show the infectious dose[s] that resulted in the highest observed transmitting proportion.

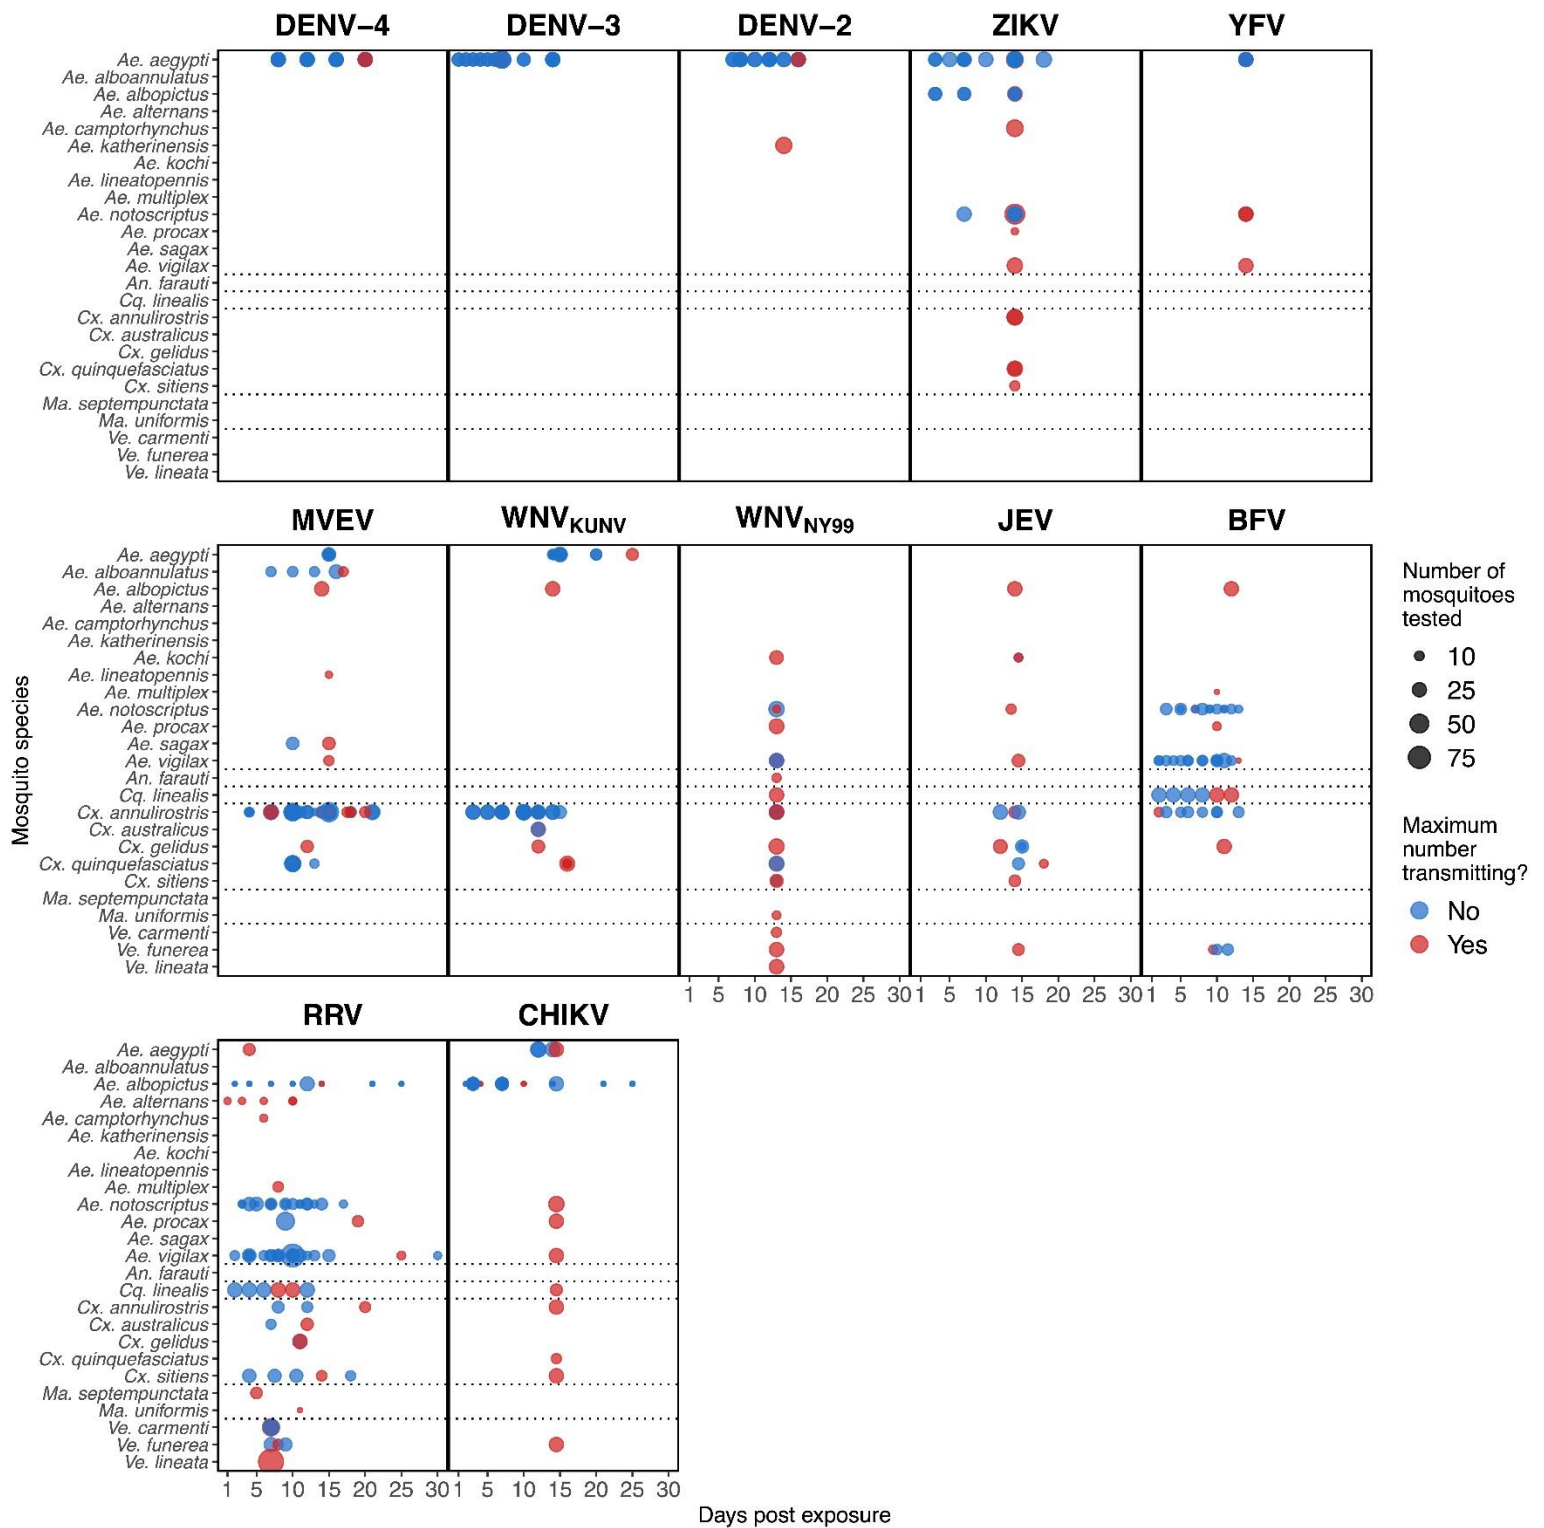

**S6 Fig. Days post viral exposure on which mosquitoes were tested for their ability to transmit viruses.**

Blue points show experimental days that did not lead to the highest detected proportion of transmitting mosquitoes; red points show the day[s] that resulted in the highest observed transmitting proportion.

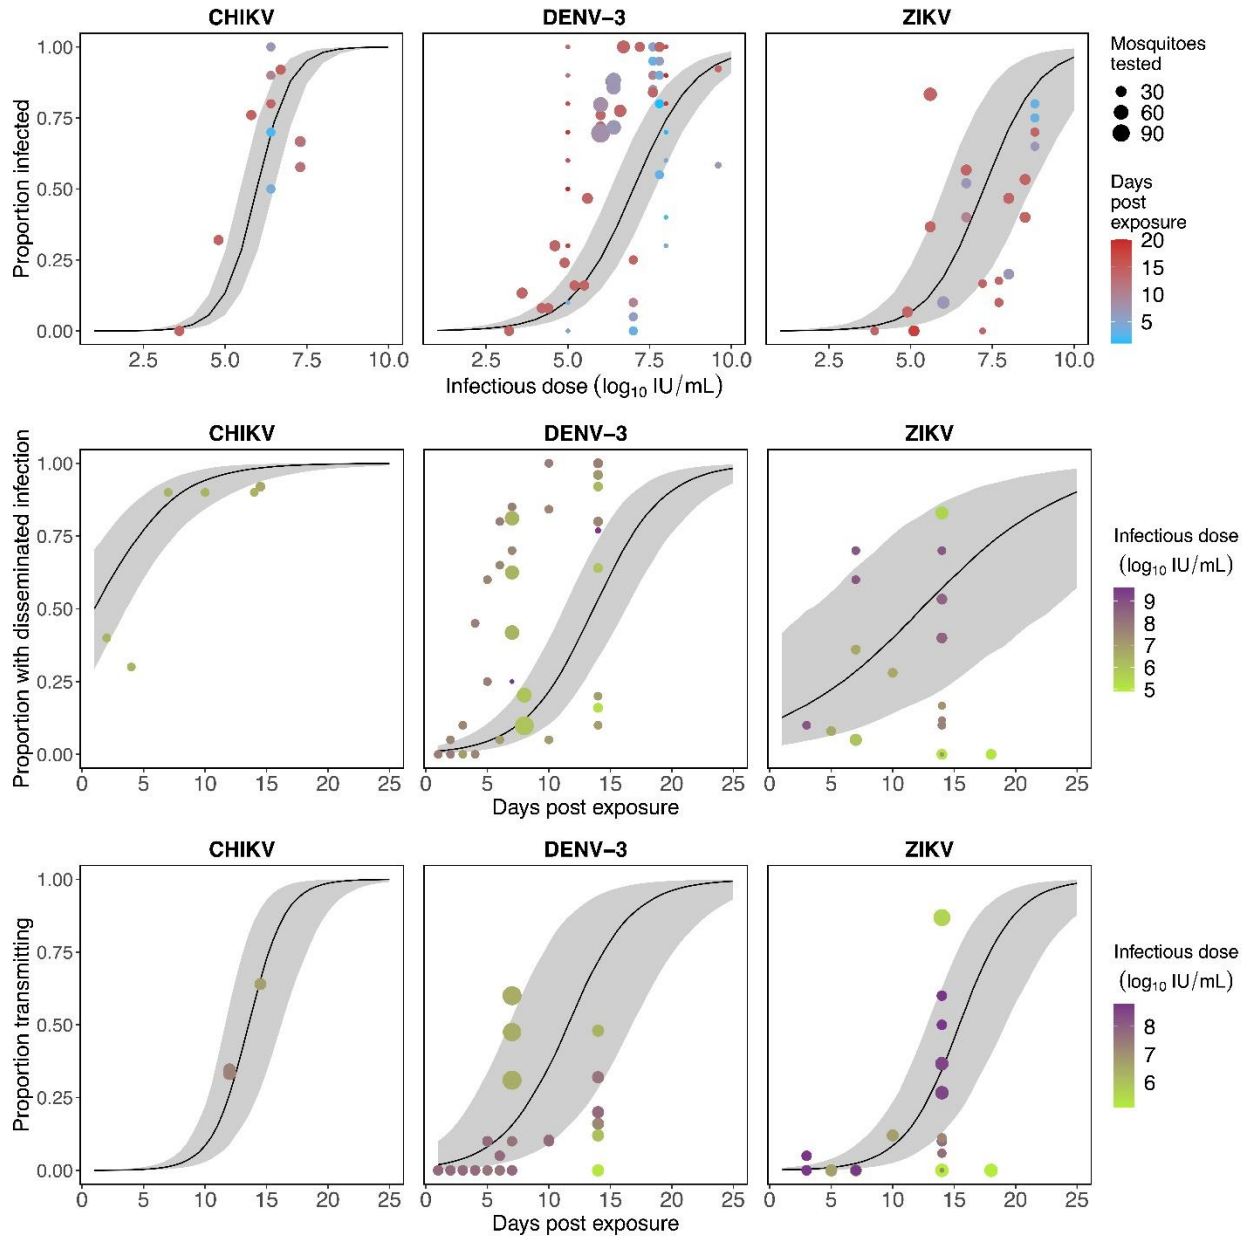

**S7 Fig. Continuous functions for mosquito infection over dose (top), and for dissemination and transmission over time (middle and bottom, respectively).** The results pictured here are from a generalized linear mixed effects model (GLMM) using *Aedes aegypti* for all viruses they have been tested with in the lab; however, here we only show the three viruses for which more than one data point exist for infection, dissemination, and transmission. For infection (top), medians (solid lines) and 95% confidence intervals (grey bands) are estimated using twelve days post inoculation; for dissemination (middle) and transmission (bottom) estimates are drawn for a dose of 7  $\log_{10}$  IU/mL.
